# Supplementary material for: Numerical Analysis of Multifunctional Biosensor with Dual-Channel Photonic Crystal Fibers Based on Localized Surface Plasmon Resonance
Source: MDPI journal article supplement (doi:10.3390/coatings12060742), 2022-05-28
Supplement: s1 [file s1]

Archive with 1 entries (1 files):
- coatings-1716736-supplementary.pdf
