# Supplementary material for: Numerical Analysis of Multifunctional Biosensor with Dual-Channel Photonic Crystal Fibers Based on Localized Surface Plasmon Resonance
Source: MDPI journal article supplement (doi:10.3390/coatings12060742), 2022-05-28
Supplement: s1 [file s1 › coatings-1716736-supplementary.pdf]

# Supplementary Materials: Numerical Analysis of Multifunctional Biosensor with Dual-Channel Photonic Crystal Fibers Based on Localized Surface Plasmon Resonance

Jingwei Lv <sup>1</sup>, Famei Wang <sup>1</sup>, Chunjie Hu <sup>2</sup>, Lin Yang <sup>1</sup>, Haihao Fu <sup>1</sup>, Yanshu Zeng <sup>1</sup>, Paul K. Chu <sup>3,4,5</sup> and Chao Liu <sup>1,\*</sup>

<sup>1</sup> School of Physics and Electronic Engineering, Northeast Petroleum University, Daqing 163318, China; lvjingwei2009123@126.com (J.L.); wfm\_lele@126.com (F.W.); wlydzyl@126.com (L.Y.); hhwt972161337@163.com (H.F.); zengyanshu66@163.com (Y.Z.)

<sup>2</sup> Department of Gynaecology and Obstetrics, The Fourth Affiliated Hospital of Harbin Medical University, Harbin 150001, China; huchunjie2008@aliyun.com

<sup>3</sup> Department of Physics, City University of Hong Kong, Tat Chee Avenue, Hong Kong 999077, China; paul.chu@cityu.edu.hk

<sup>4</sup> Department of Materials Science and Engineering, City University of Hong Kong, Tat Chee Avenue, Hong Kong 999077, China

<sup>5</sup> Department of Biomedical Engineering, City University of Hong Kong, Tat Chee Avenue, Hong Kong 999077, China

\* Correspondence: msm-liu@126.com

Wang et al. designed a plasmonic PCF sensor coated with protein A-gold nanoparticles-gold film and experimentally investigated for the detection of immunoglobulin G [21,22]. The gold film with was sputtered onto the surface of the PCF by a magnetron sputtering apparatus. For the fabrication of gold nanoparticles-based Au film PCF sensor, the PCF sensor sputtered with Au film was immersed into metal nanoparticles solution, then rinsed with distilled water and dried with in the air. An SEM image showing the intersecting surface of the as-fabricated sensor is shown in Figure S1.

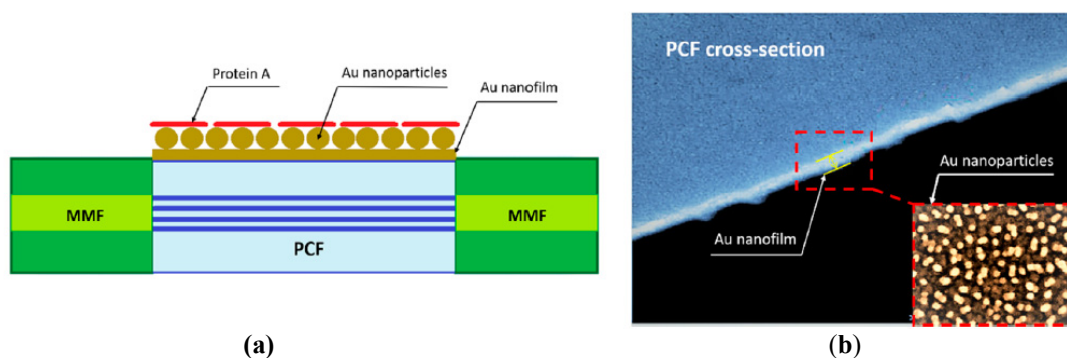

**Figure S1.** (a) Schematic of the SPR PCF sensor proposed in [21,22]. (b) SEM image of gold nanofilm on the PCF surface.
